# Supplementary material for: Cerebrospinal Fluid and Brain Tissue Penetration of Tenofovir, Lamivudine, and Efavirenz in Postmortem Tissues with Cryptococcal Meningitis
Source: PubMed Central journal article supplement (PMC6742940; doi:10.1111/cts.12661), 2019-07-10
Supplement: CTS-12-445-s002.pdf [file CTS-12-445-s002.pdf]

**Table S1: Subject Characteristics**

|                                                                                                                                                                                             |                      |
|---------------------------------------------------------------------------------------------------------------------------------------------------------------------------------------------|----------------------|
| Age, median (range)                                                                                                                                                                         | 39.5 (25-52) years   |
| Sex, n male (%)                                                                                                                                                                             | 10 (63%)             |
| Post-mortem interval, median (range)                                                                                                                                                        | 5.2 (2.2-28.3) hours |
| Post-mortem serum creatinine, median (range)                                                                                                                                                | 2.3 (0.7-7.3) mg/dL  |
| Antiretroviral regimen (n on each regimen)*                                                                                                                                                 |                      |
| tenofovir disoproxil fumarate/lamivudine/efavirenz                                                                                                                                          | 11                   |
| abacavir/lamivudine/atazanavir/ritonavir                                                                                                                                                    | 2                    |
| zidovudine/lamivudine/atazanavir/ritonavir                                                                                                                                                  | 1                    |
| *2 individuals were not on antiretrovirals at time of death but their data were used to assess for post-mortem effects on other laboratory values (i.e. serum creatinine and albumin ratio) |                      |
